# Supplementary material
Source: PubMed Central journal article supplement (PMC8026487)
Supplement: NIHMS1660776-supplement-1.pdf [file NIHMS1660776-supplement-1.pdf]

## LUPUS PREGNANCY PLANNING

SUPPLEMENTAL TABLE 1: INDIVIDUAL DELIVERY OUTCOMES

| INDIVIDUAL DELIVERY OUTCOMES <sup>1</sup>                | Overall            | Not-planned        | Planned              | p-value |
|----------------------------------------------------------|--------------------|--------------------|----------------------|---------|
|                                                          | N=35               | n=15               | n=20                 |         |
| PROMISSE-APO <sup>2</sup>                                | 20/33 (61%)        | 11/14 (79%)        | 9/19 (47%)           | 0.09    |
| Neonatal death                                           | 1/33               | 1/14               | 0/19                 |         |
| Fetal death > 12 weeks                                   | 4/33               | 4/14               | 0/19                 |         |
| Preeclampsia                                             | 8/33               | 5/14               | 3/19                 |         |
| Preterm delivery < 36 weeks                              | 7/33               | 3/14               | 4/19                 |         |
| SGA < 5 <sup>th</sup> percentile                         | 6/33               | 3/14               | 3/19                 |         |
| Severe PROMISSE-APO <sup>3</sup>                         | 6/33 (18%)         | 6/14 (43%)         | 0/19 (0%)            | 0.003   |
| Neonatal death                                           | 1/33               | 1/14               | 0/19                 |         |
| Fetal death > 12 weeks                                   | 4/33               | 4/14               | 0/19                 |         |
| Preeclampsia and preterm delivery < 34 weeks             | 2/33               | 2/14               | 0/19                 |         |
| Preterm delivery < 30 weeks                              | 2/33               | 2/14               | 0/19                 |         |
| Severe Neonatal Outcome <sup>4</sup>                     | 13/29 (45%)        | 7/10 (70%)         | 6/19 (32%)           | 0.06    |
| Neonatal death                                           | 1/29               | 1/10               | 0/19                 |         |
| NICU stay > 1 week                                       | 8/29               | 5/10               | 3/19                 |         |
| APGAR < 7 at 5 min                                       | 2/29               | 1/10               | 1/19                 |         |
| SGA < 5 <sup>th</sup> percentile                         | 6/29               | 3/10               | 3/19                 |         |
| Non-live Births:                                         | 6 (17%)            | 5 (33%)            | 1 (5%)               | 0.06    |
| Termination                                              | 1 (3%)             | 1 (7%)             | 0 (0%)               | 0.4     |
| Miscarriage                                              | 4 (11%)            | 3 (20%)            | 1 (5%)               | 0.3     |
| Stillbirth                                               | 1 (3%)             | 1 (7%)             | 0 (0%)               | 0.4     |
| Live Births:                                             | 29 (83%)           | 10 (67%)           | 19 (95%)             | 0.06    |
| Gestational age at delivery, weeks (mean ± S.D.) (range) | 36.2 ± 3.4 (24-39) | 35.3 ± 5.1 (24-39) | 36.7 ± 2.2 (30 – 39) | 0.4     |
| Preterm Birth                                            | 10/29 (34%)        | 4/10 (40%)         | 6/19 (32%)           | 0.7     |
| SGA < 10 <sup>th</sup> percentile                        | 7/29 (24%)         | 4/10 (40%)         | 3/19 (16%)           | 0.2     |
| Preeclampsia                                             | 8/30 (27%)         | 5/11 (45%)         | 3/19 (16%)           | 0.1     |

1. Delivery outcomes were missing for 8 pregnancies as patients had either not delivered as of 4/1/2020 (n=7) or data was unavailable through chart review (n=1).
2. PROMISSE-APO: neonatal death, fetal death > 12 weeks, preeclampsia, preterm delivery < 36 weeks, or small for gestational age (SGA) < 5<sup>th</sup> percentile. Pregnancy losses < 12 weeks were excluded.<sup>10</sup>
3. Severe PROMISSE-APO: neonatal death, fetal death > 12 weeks, preeclampsia and preterm delivery < 34 weeks, or preterm delivery < 30 weeks. Pregnancy losses < 12 weeks were excluded.<sup>10</sup>
4. Severe neonatal outcomes among live births: neonatal death, NICU stay > 1 week, APGAR < 7 at 5 minutes, or SGA < 5<sup>th</sup> percentile.

## LUPUS PREGNANCY PLANNING

SUPPLEMENTAL TABLE 2: COMPOSITE DELIVERY OUTCOMES BY DEMOGRAPHICS

| MATERNAL RACE <sup>1</sup>           | Black<br>n=15               | White or Other<br>n=20          | p-value |
|--------------------------------------|-----------------------------|---------------------------------|---------|
| PROMISSE-APO <sup>2</sup>            | 10/14 (71%)                 | 10/19 (53%)                     | 0.3     |
| Severe PROMISSE-APO <sup>3</sup>     | 4/14 (29%)                  | 2/19 (11%)                      | 0.4     |
| Severe Neonatal Outcome <sup>4</sup> | 6/11 (55%)                  | 7/18 (39%)                      | 0.5     |
| MATERNAL AGE <sup>1</sup>            | < 25 years<br>n=6           | ≥ 25 years<br>n=29              | p-value |
| PROMISSE-APO <sup>2</sup>            | 4/6 (67%)                   | 16/27 (59%)                     | 1.0     |
| Severe PROMISSE-APO <sup>3</sup>     | 2/6 (33%)                   | 4/27 (15%)                      | 0.3     |
| Severe Neonatal Outcome <sup>4</sup> | 2/4 (50%)                   | 11/25 (44%)                     | 1.0     |
| EDUCATION LEVEL <sup>1</sup>         | Less than college<br>n=13   | College graduate<br>n=22        | p-value |
| PROMISSE-APO <sup>2</sup>            | 8/12 (67%)                  | 12/21 (57%)                     | 0.7     |
| Severe PROMISSE-APO <sup>3</sup>     | 3/12 (25%)                  | 3/21 (14%)                      | 0.6     |
| Severe Neonatal Outcome <sup>4</sup> | 7/10 (70%)                  | 6/19 (32%)                      | 0.06    |
| MARITAL STATUS <sup>1</sup>          | Single or no partner<br>n=8 | Married or with partner<br>n=27 | p-value |
| PROMISSE-APO <sup>2</sup>            | 5/8 (63%)                   | 15/25 (60%)                     | 1.0     |
| Severe PROMISSE-APO <sup>3</sup>     | 1/8 (13%)                   | 5/25 (20%)                      | 1.0     |
| Severe Neonatal Outcome <sup>4</sup> | 5/7 (71%)                   | 8/22 (36%)                      | 0.2     |
| HEALTH INSURANCE <sup>1</sup>        | Medicaid<br>n=12            | No Medicaid<br>n=23             | p-value |
| PROMISSE-APO <sup>2</sup>            | 7/11 (64%)                  | 13/22 (59%)                     | 1.0     |
| Severe PROMISSE-APO <sup>3</sup>     | 2/11 (18%)                  | 4/22 (18%)                      | 1.0     |
| Severe Neonatal Outcome <sup>4</sup> | 6/9 (67%)                   | 7/20 (35%)                      | 0.2     |
| ANNUAL INCOME <sup>1</sup>           | ≤ \$50,000<br>n=13          | > \$50,000<br>n=19              | p-value |
| PROMISSE-APO <sup>2</sup>            | 8/12 (67%)                  | 10/18 (56%)                     | 0.7     |
| Severe PROMISSE-APO <sup>3</sup>     | 1/12 (8%)                   | 5/18 (28%)                      | 0.4     |
| Severe Neonatal Outcome <sup>4</sup> | 7/11 (64%)                  | 4/15 (27%)                      | 0.1     |

1. Delivery outcomes were missing for 8 pregnancies as patients had either not delivered as of 4/1/2020 (n=7) or data was unavailable through chart review (n=1).
2. PROMISSE-APO: neonatal death, fetal death > 12 weeks, preeclampsia, preterm delivery < 36 weeks, or small for gestational age (SGA) < 5th percentile. Pregnancy losses < 12 weeks were excluded.<sup>10</sup>
3. Severe PROMISSE-APO: neonatal death, fetal death > 12 weeks, preeclampsia and preterm delivery < 34 weeks, or preterm delivery < 30 weeks. Pregnancy losses < 12 weeks were excluded.<sup>10</sup>
4. Severe neonatal outcomes among live births: neonatal death, NICU stay > 1 week, APGAR < 7 at 5 minutes, or SGA < 5th percentile.
